# Supplementary material
Source: publisher figshare collection journal article supplement (https://tandf.figshare.com/ndownloader/files/4894702)

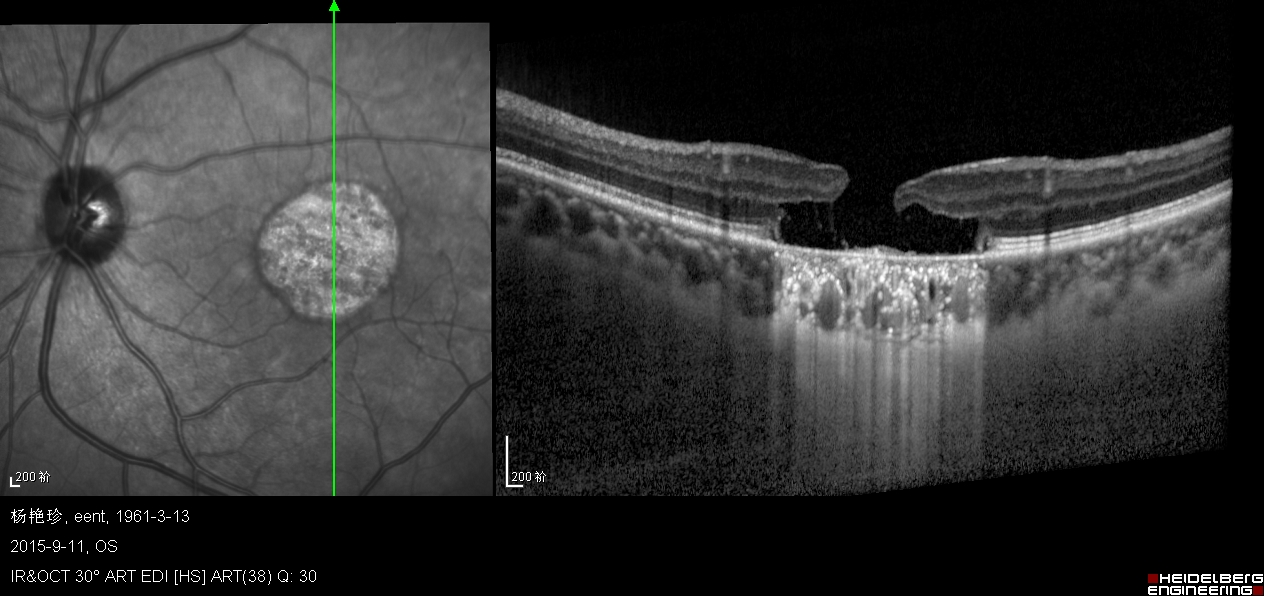


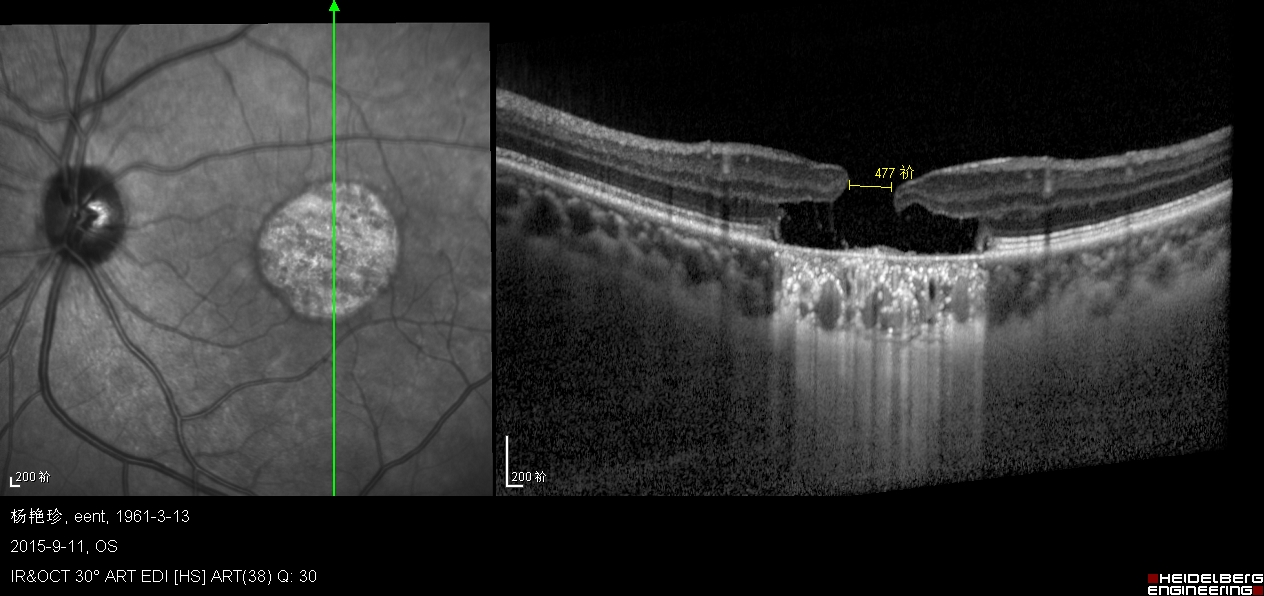


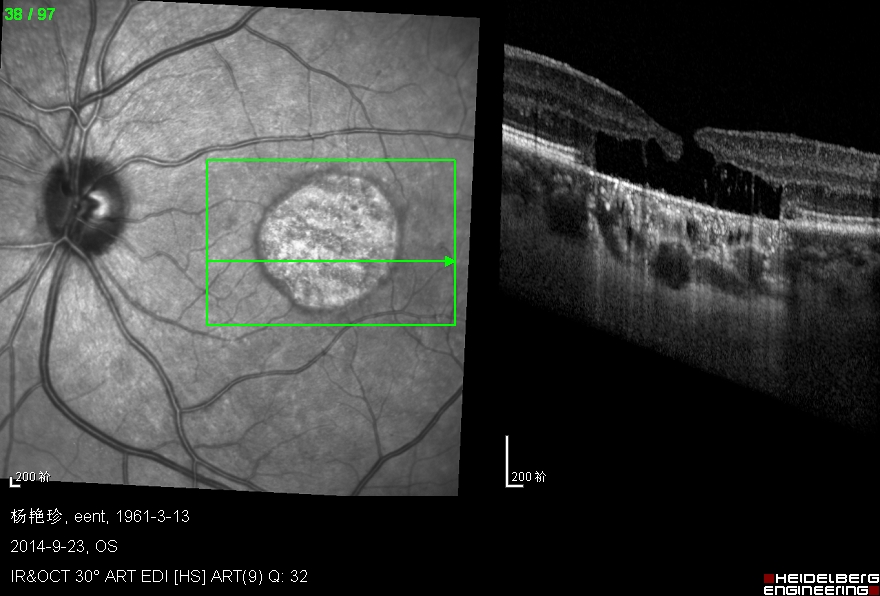

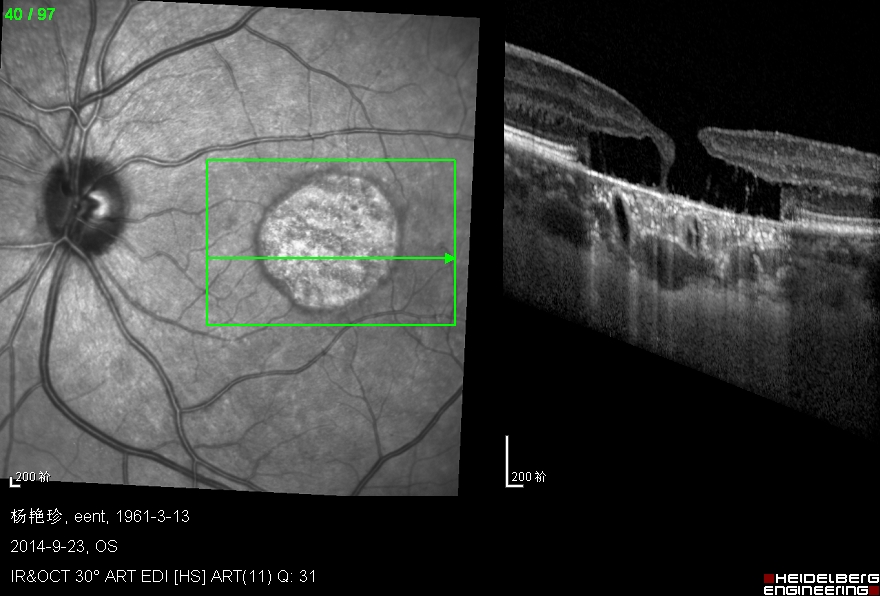


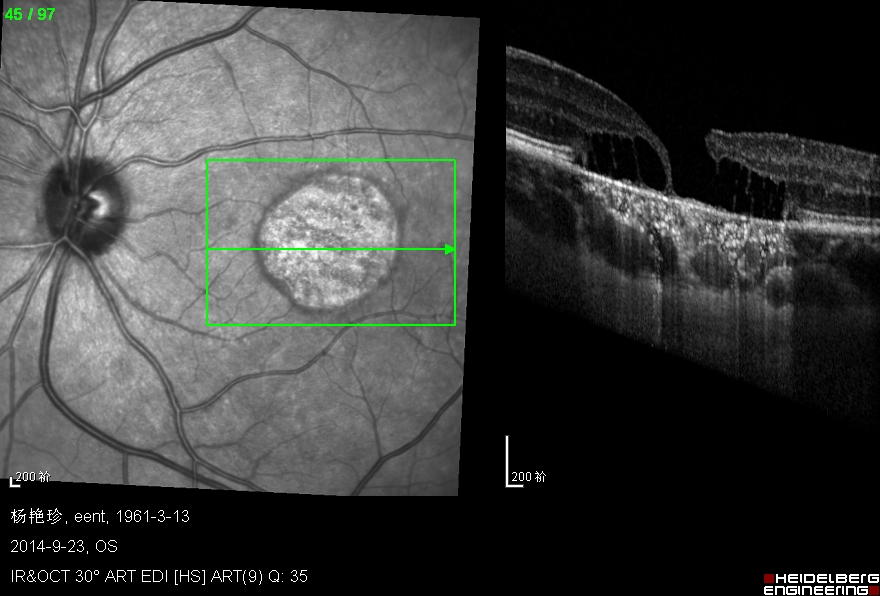


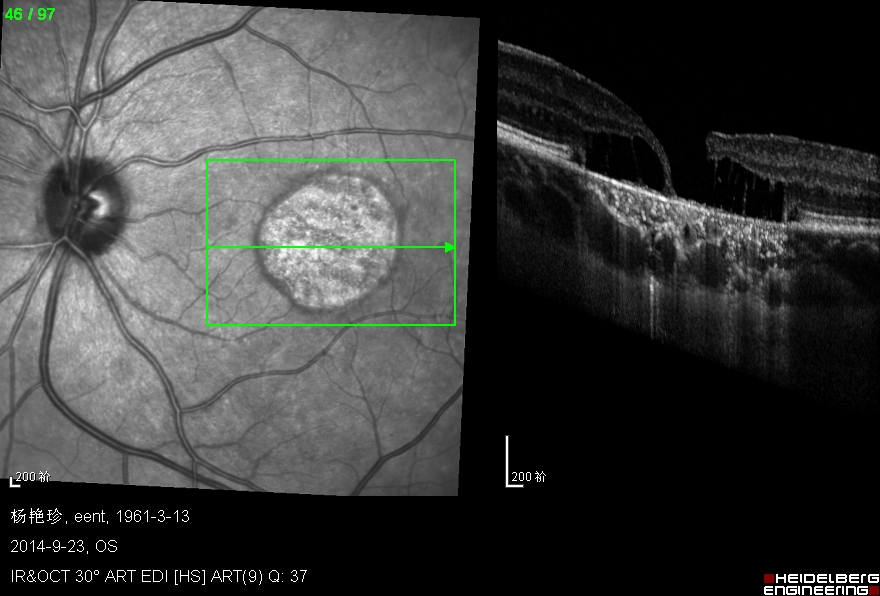

Supplement: Supplementary file 1 [file 4894702]
